# Supplementary material
Source: PubMed Central journal article supplement (PMC3914627)
Supplement: 6b00450a17ca773d651717a2cf465c43_genetics.113.157628-3.pdf [file 6b00450a17ca773d651717a2cf465c43_genetics.113.157628-3.pdf]

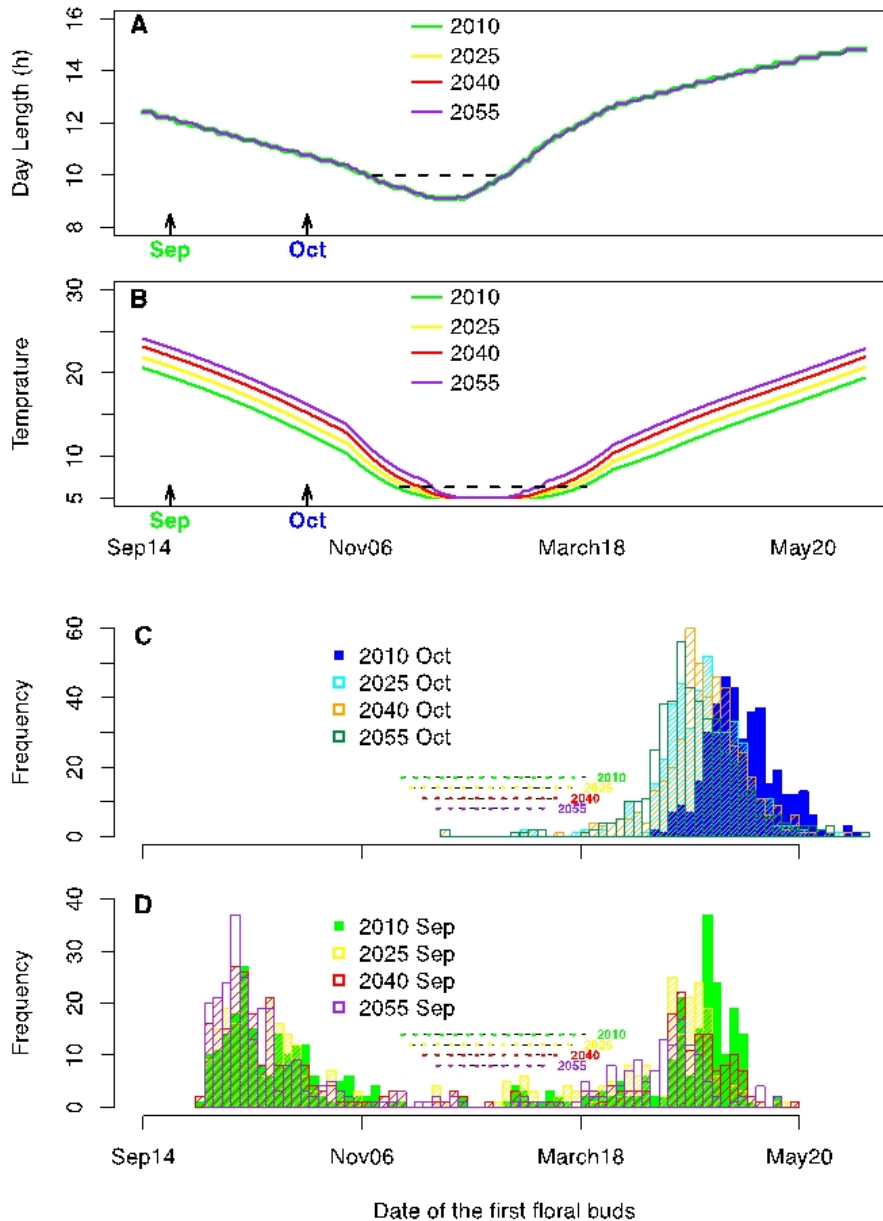

**Figure S1** Simulated climates and flowering time of the worldwide *A. thaliana* population in Fall germination cohorts. (A) Day length during the experiment. Horizontal dashed line represents the duration of the winter periods when day length is 10 h or shorter. (B) Average daily temperature during the experiment. Horizontal dashed line corresponds to 6°C. Histogram of flowering time under current (2010) and future climates (2025, 2040, and 2055) for (C) October and (D) September planting. Horizontal dashed lines corresponding to the winter periods when average daily temperature is 6°C or below.

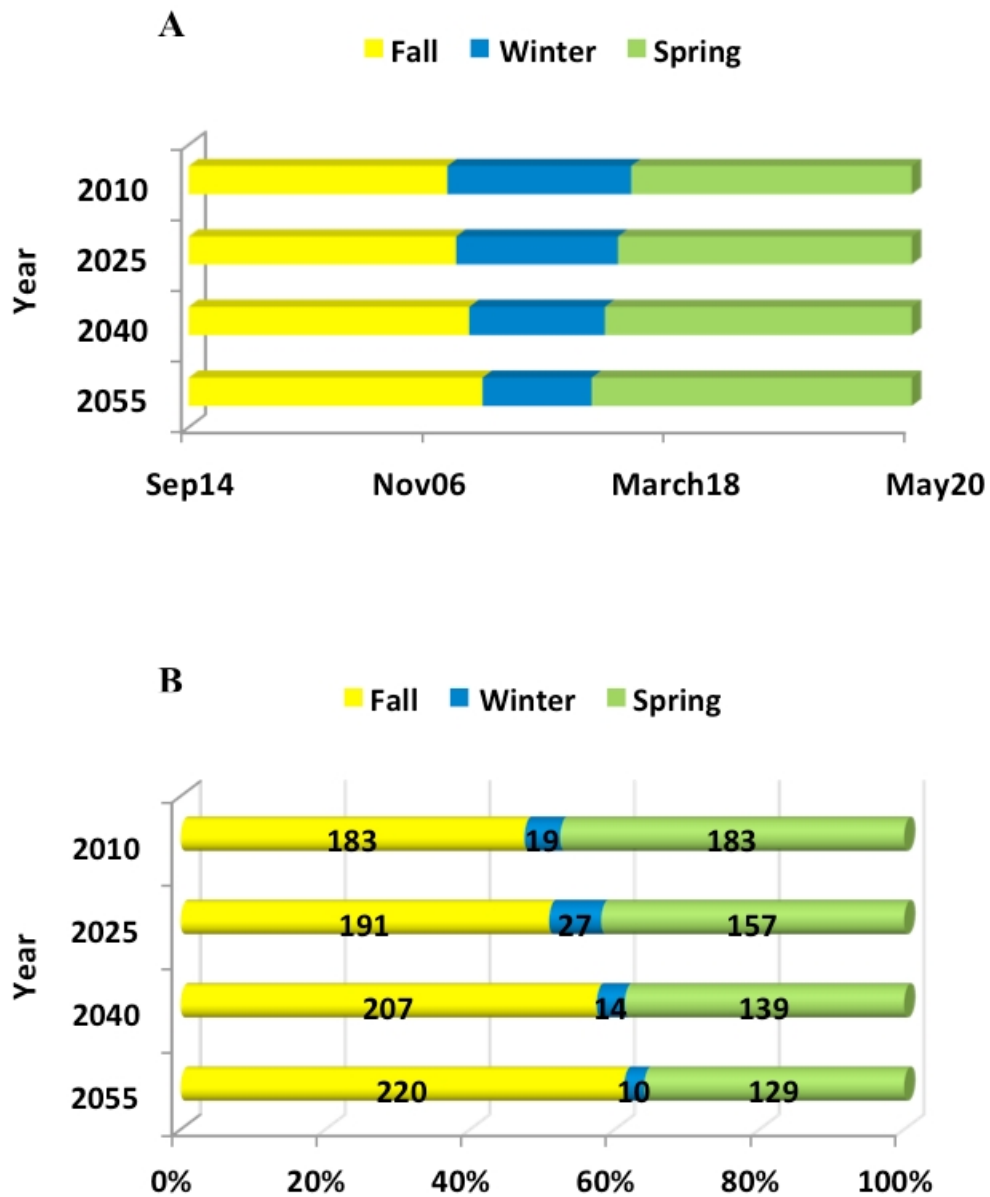

**Figure S2** Impact of future warming on seasons and percentages of flowering groups. (A) Simulated climates split by season. Winter days correspond to average daily temp of 6C. (B) The proportion of rapid cycling plants, that flowered in Fall, is increased with future warming. The numbers inside the bars represent the counts (number of accessions) in the flowering groups.

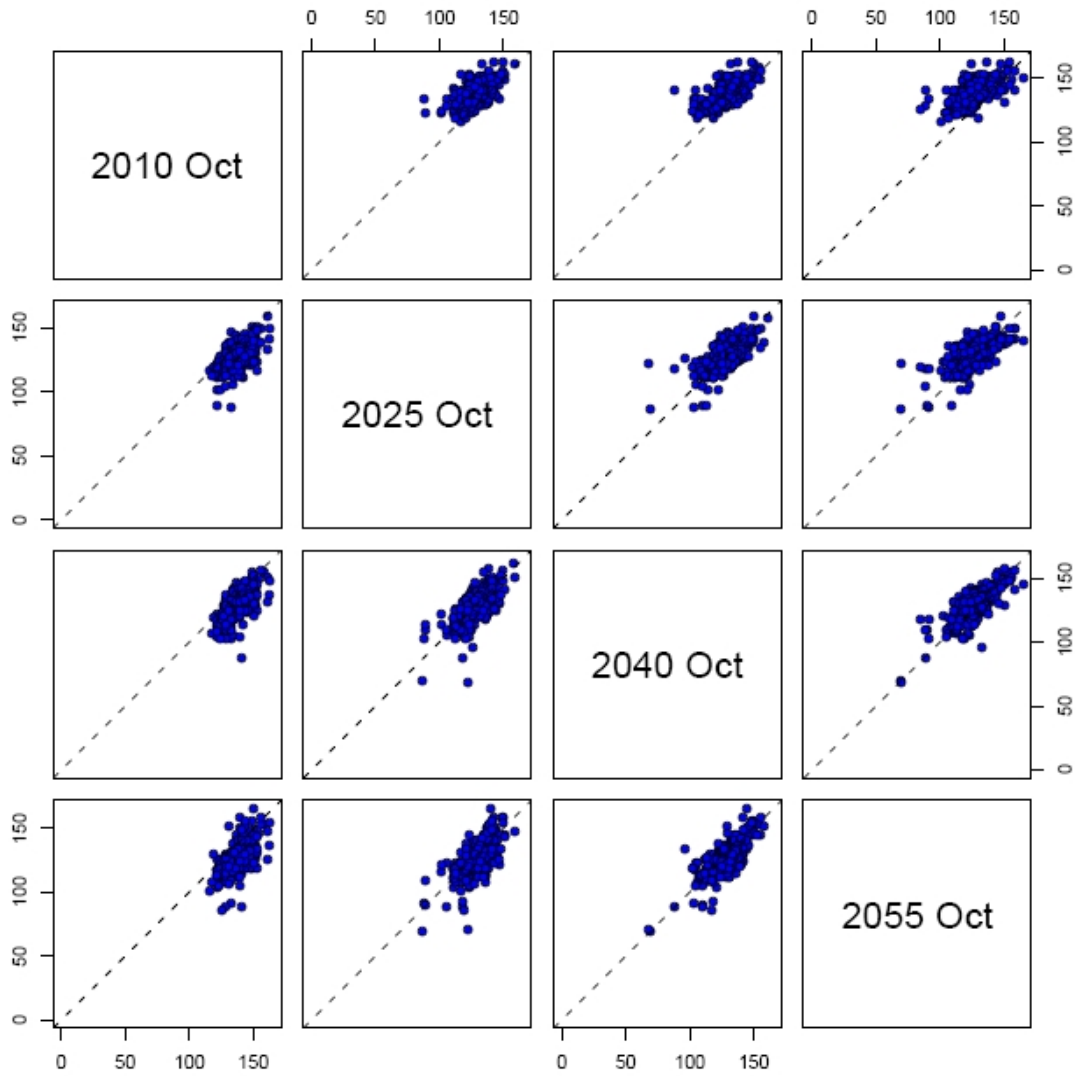

**Figure S3** Pairwise plots of October flowering time (FT) under simulated current (2010) and future (2025, 2040, and 2055) climates. Each dot represents the FT of one accession in two environments.

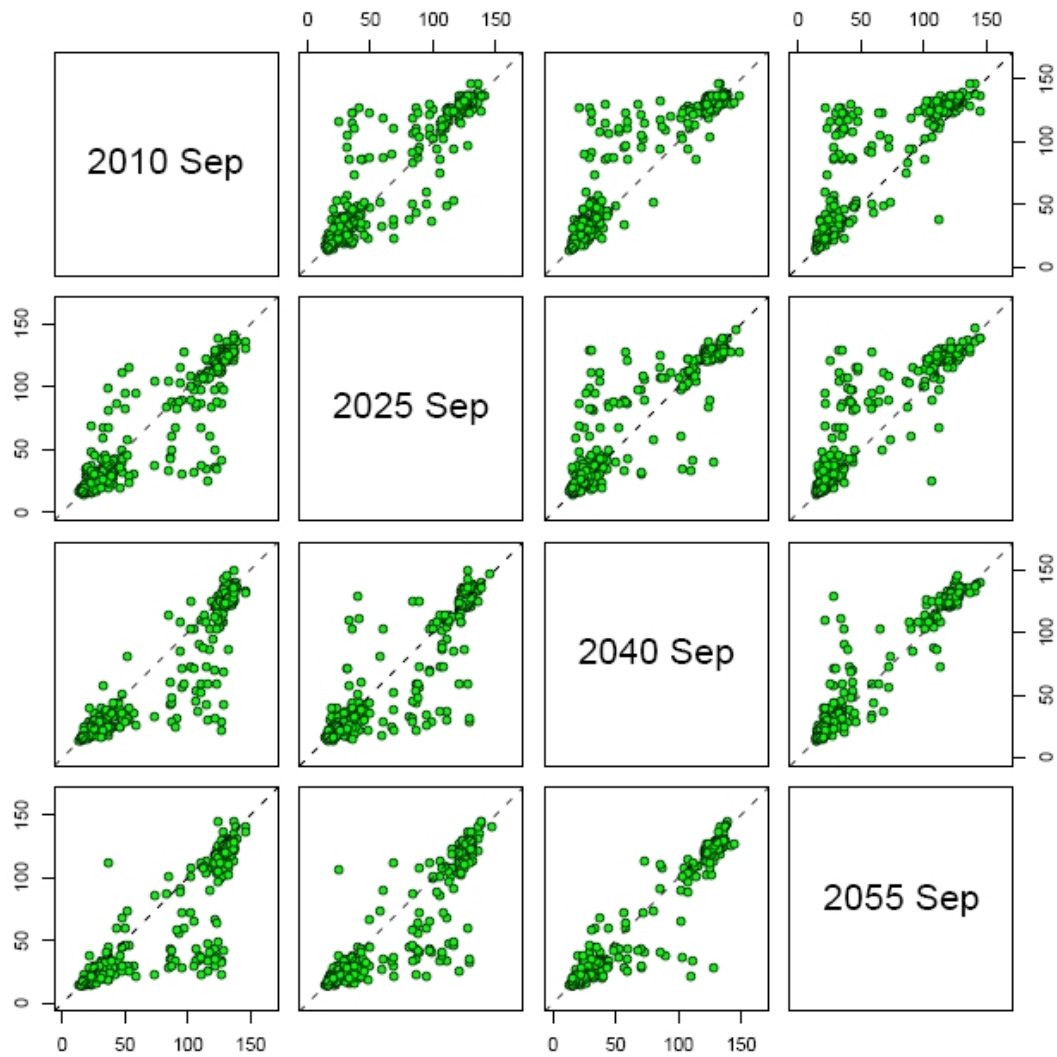

**Figure S4** Pairwise plots of September flowering time (FT) under simulated current (2010) and future (2025, 2040, and 2055) climates. Each dot represents the FT of one accession in two environments.

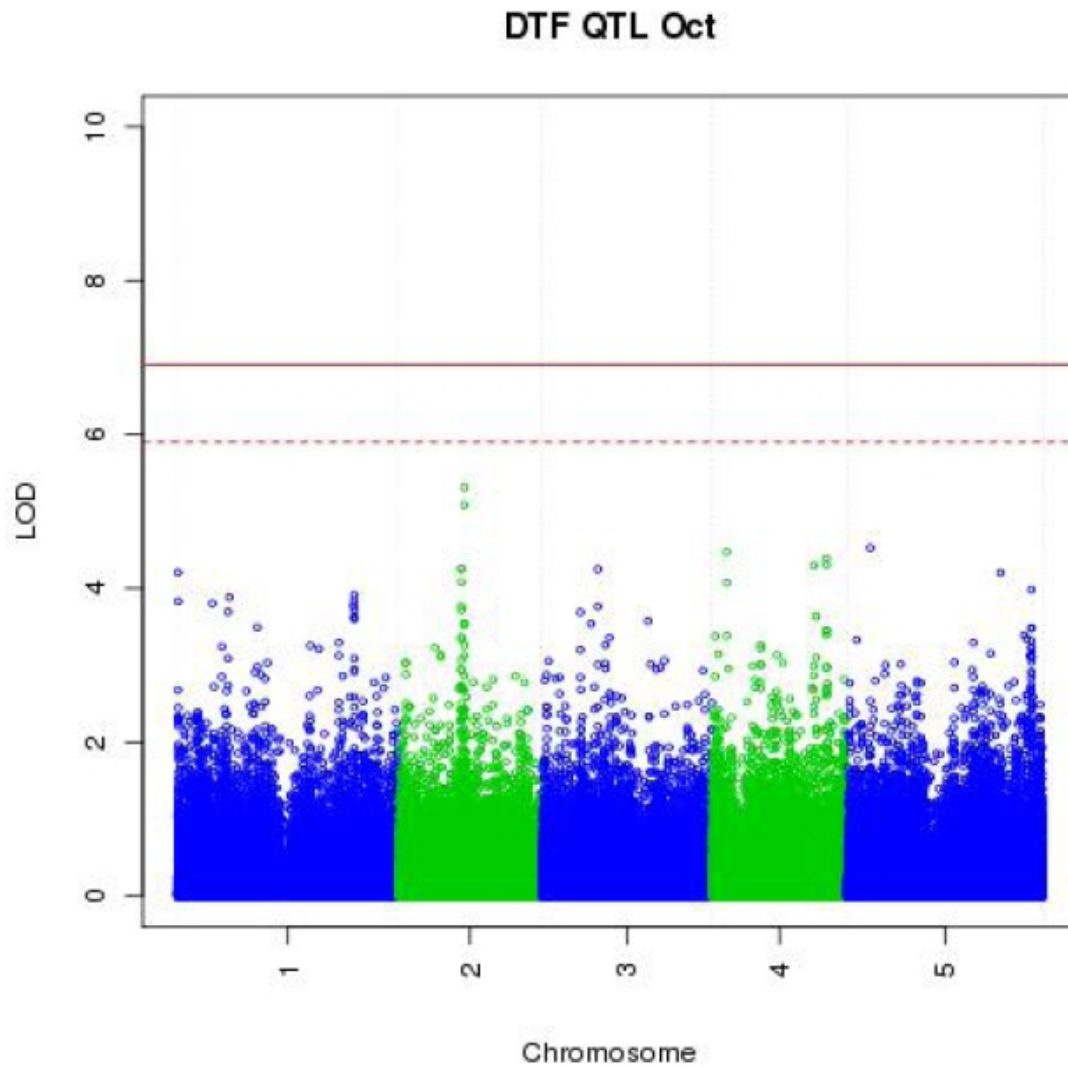

**Figure S5** Genome-wide association of flowering time (days to flower) for main FT in October. The dashed horizontal line represents the 5% empirical genome-wide significance threshold and solid line represents the 1% threshold.

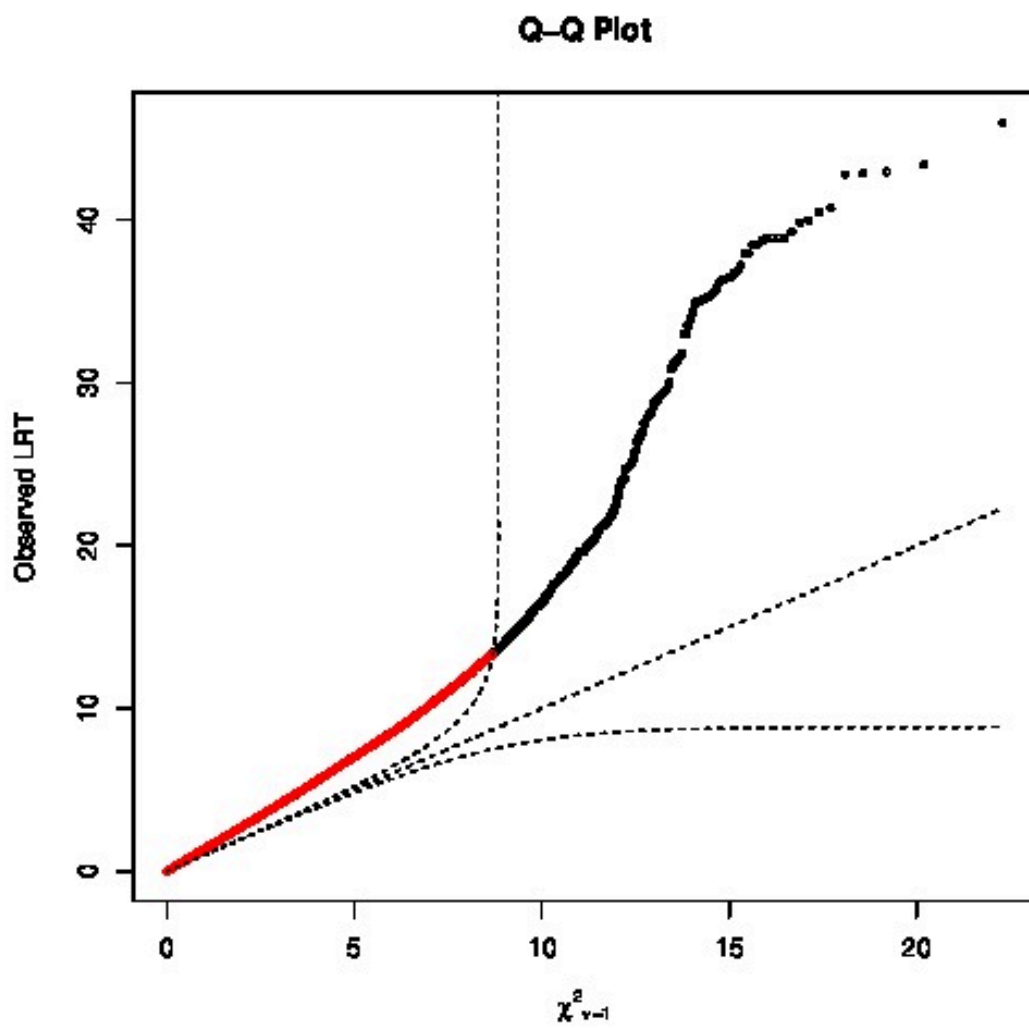

Figure S6 Quantile Quantile plot for FFT QTL

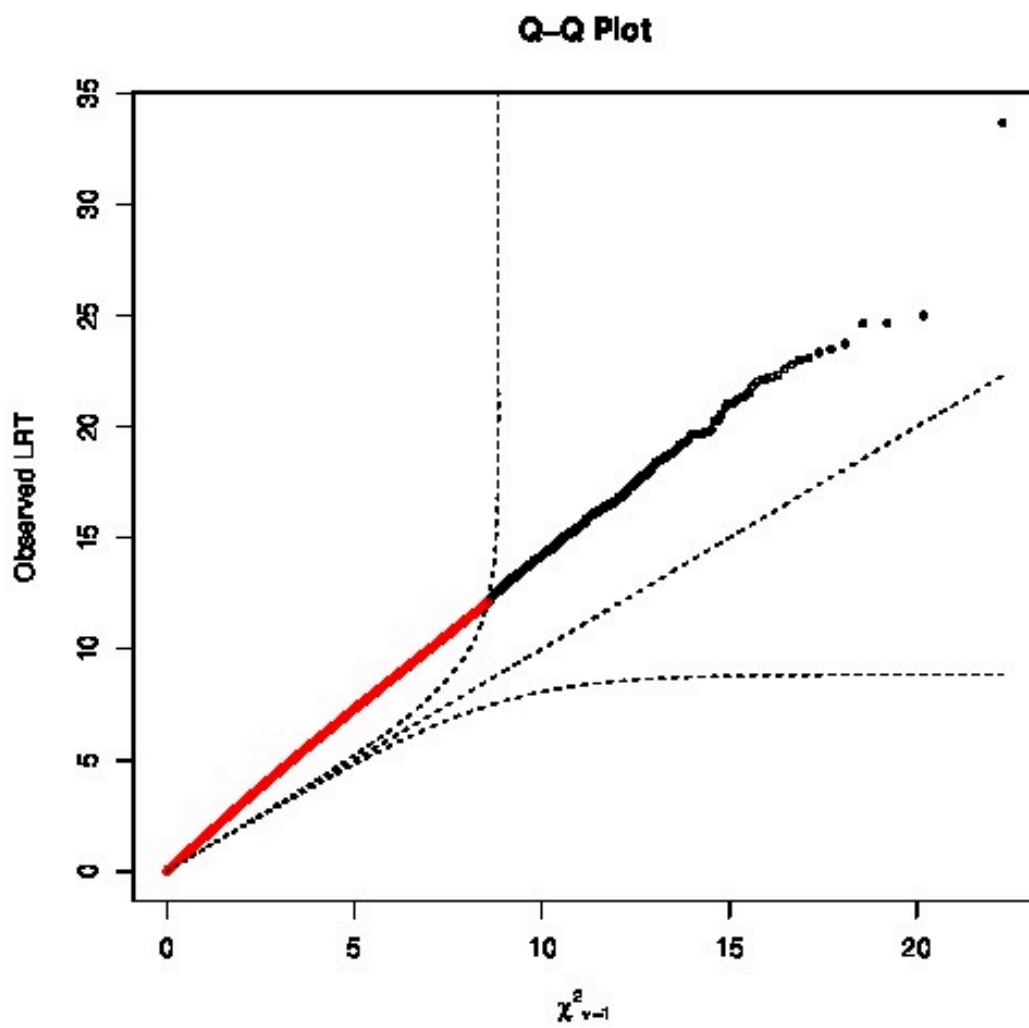

Figure S7 Quantile Quantile plot for THERM QTL

**Files S1-S4**

**Available for download at <http://www.genetics.org/lookup/suppl/doi:10.1534/genetics.113.157628/-/DC1>**

**File S1** All phenotype data

**File S2** September phenotype data

**File S3** GenotypeTAIR9.csv file

**File S4** Light
