# Supplementary material
Source: PubMed Central journal article supplement (PMC3914627)
Supplement: 9c08621376140050e9e067955b3864a5_genetics.113.157628-7.pdf [file 9c08621376140050e9e067955b3864a5_genetics.113.157628-7.pdf]

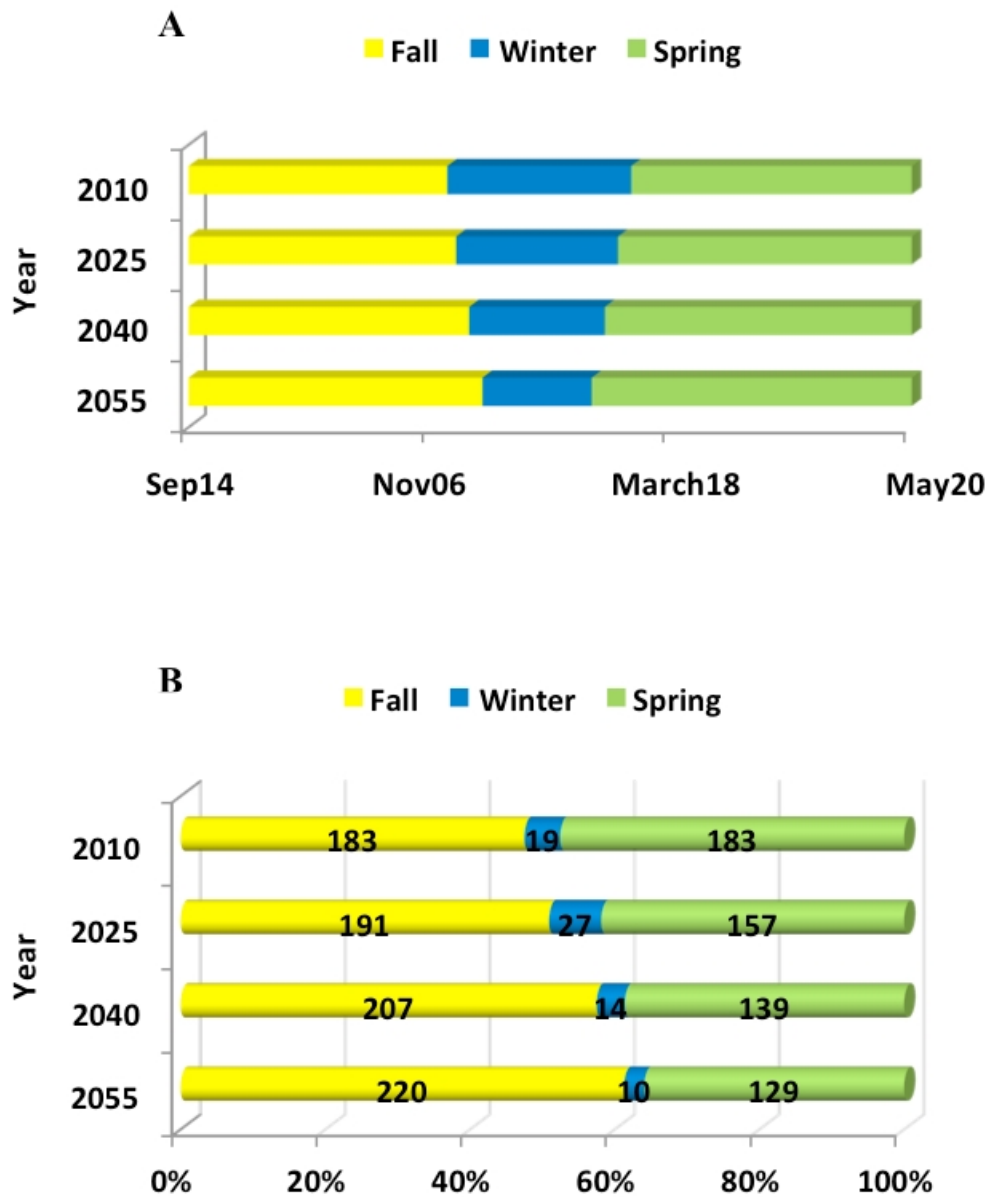

**Figure S2** Impact of future warming on seasons and percentages of flowering groups. (A) Simulated climates split by season. Winter days correspond to average daily temp of 6C. (B) The proportion of rapid cycling plants, that flowered in Fall, is increased with future warming. The numbers inside the bars represent the counts (number of accessions) in the flowering groups.
