# Supplementary material
Source: PubMed Central journal article supplement (PMC3914627)
Supplement: 91d3336a77a7428e6e8269596f610a4c_genetics.113.157628-4.pdf [file 91d3336a77a7428e6e8269596f610a4c_genetics.113.157628-4.pdf]

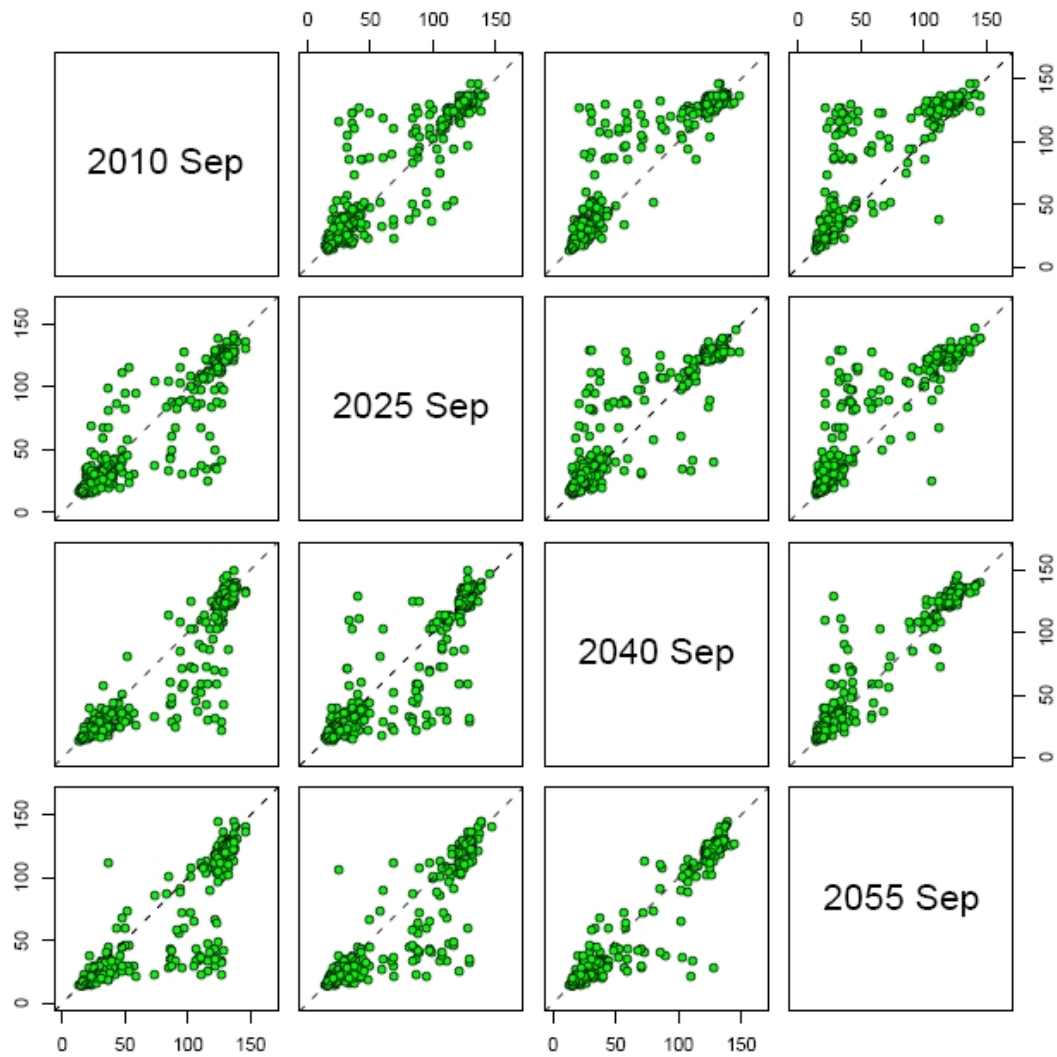

**Figure S4** Pairwise plots of September flowering time (FT) under simulated current (2010) and future (2025, 2040, and 2055) climates. Each dot represents the FT of one accession in two environments.
