# Supplementary material
Source: PubMed Central journal article supplement (PMC3914627)
Supplement: 264a0f60eaed924f9a073bba435ff145_genetics.113.157628-10.pdf [file 264a0f60eaed924f9a073bba435ff145_genetics.113.157628-10.pdf]

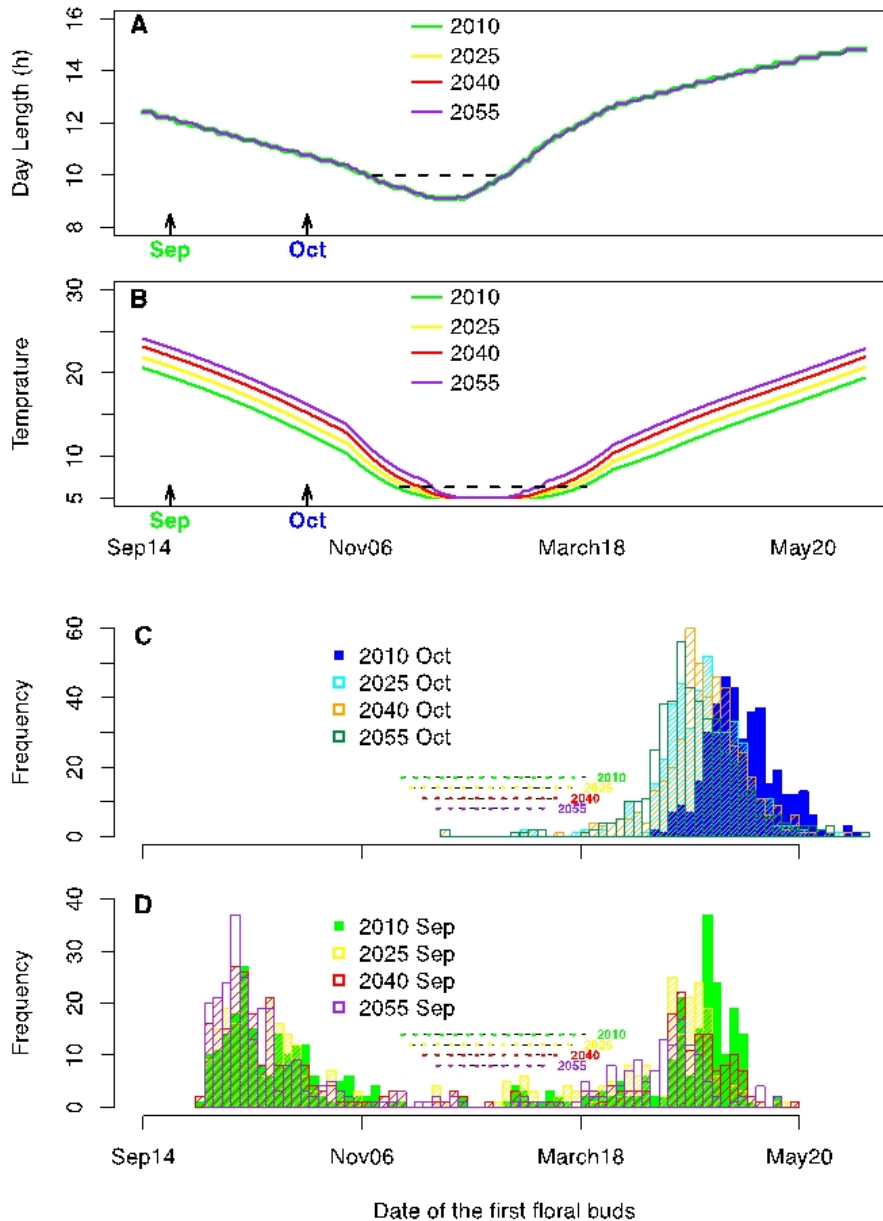

**Figure S1** Simulated climates and flowering time of the worldwide *A. thaliana* population in Fall germination cohorts. (A) Day length during the experiment. Horizontal dashed line represents the duration of the winter periods when day length is 10 h or shorter. (B) Average daily temperature during the experiment. Horizontal dashed line corresponds to 6°C. Histogram of flowering time under current (2010) and future climates (2025, 2040, and 2055) for (C) October and (D) September planting. Horizontal dashed lines corresponding to the winter periods when average daily temperature is 6°C or below.
