# Supplementary material
Source: PubMed Central journal article supplement (PMC3914627)
Supplement: b4ac972df6a54582617bc559cba1c178_genetics.113.157628-9.pdf [file b4ac972df6a54582617bc559cba1c178_genetics.113.157628-9.pdf]

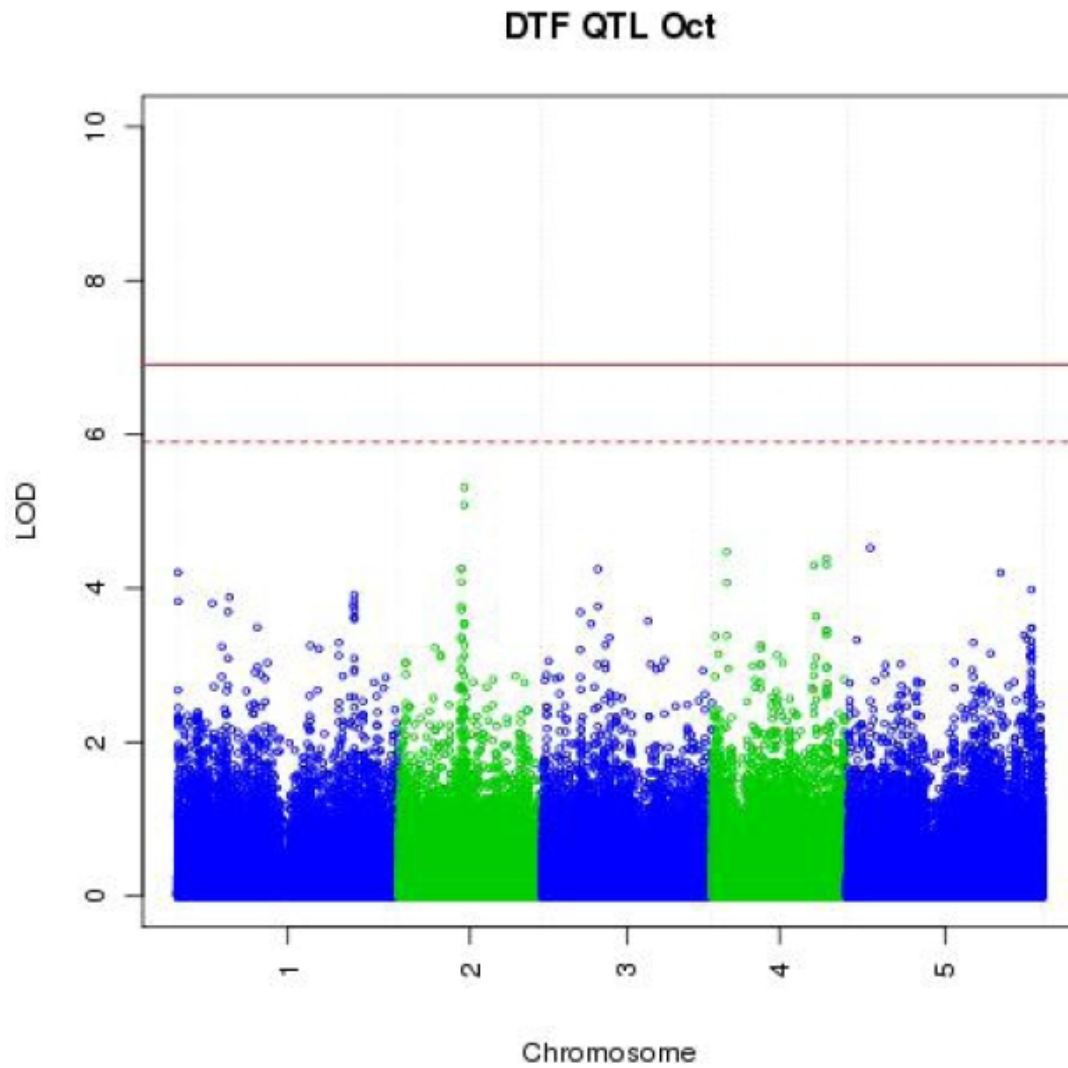

**Figure S5** Genome-wide association of flowering time (days to flower) for main FT in October. The dashed horizontal line represents the 5% empirical genome-wide significance threshold and solid line represents the 1% threshold.
