# Supplementary material
Source: PubMed Central journal article supplement (PMC3914627)
Supplement: cb195127e780e93deb3bb4d47e2c5f5e_genetics.113.157628-6.pdf [file cb195127e780e93deb3bb4d47e2c5f5e_genetics.113.157628-6.pdf]

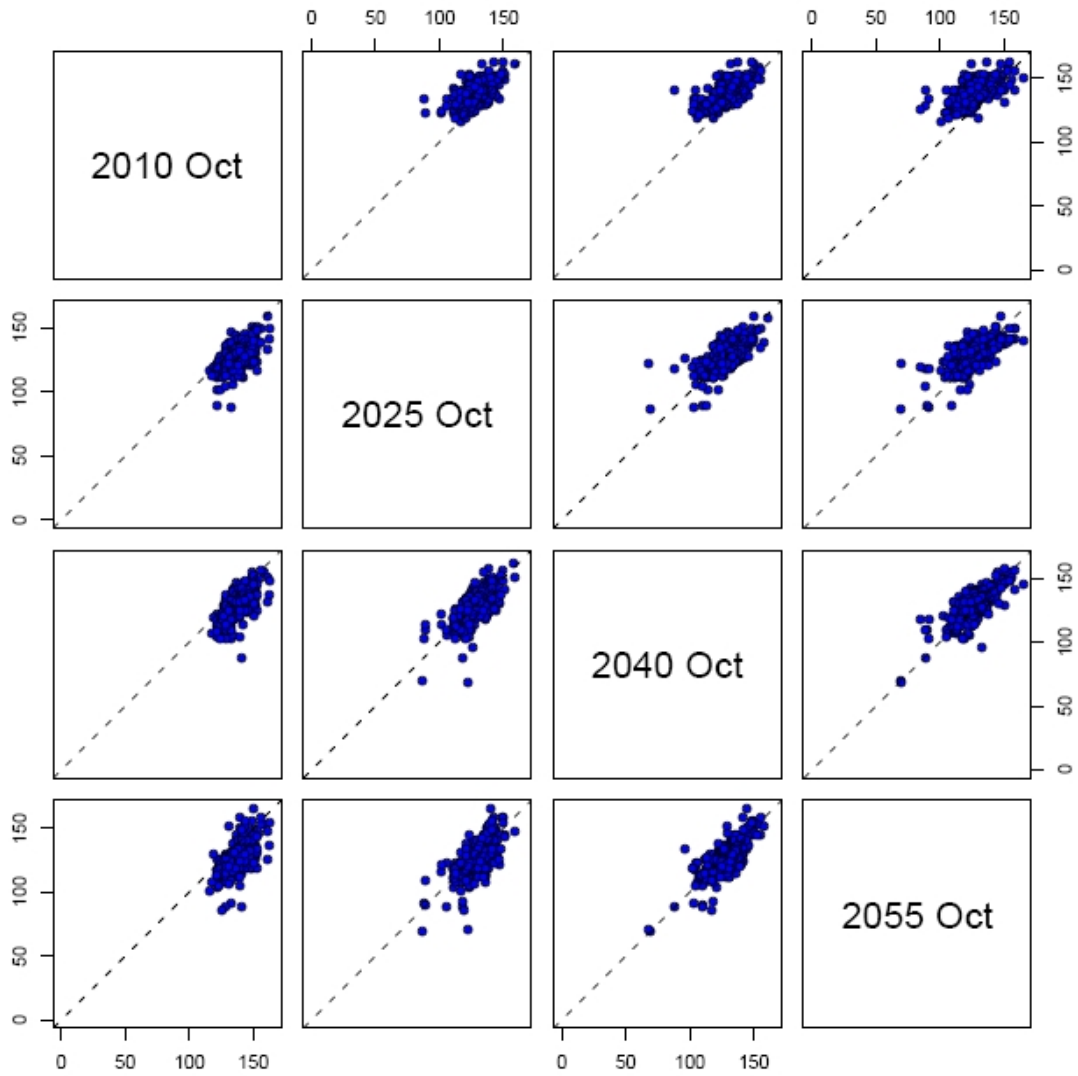

**Figure S3** Pairwise plots of October flowering time (FT) under simulated current (2010) and future (2025, 2040, and 2055) climates. Each dot represents the FT of one accession in two environments.
