# Supplementary material
Source: PubMed Central journal article supplement (PMC3914627)

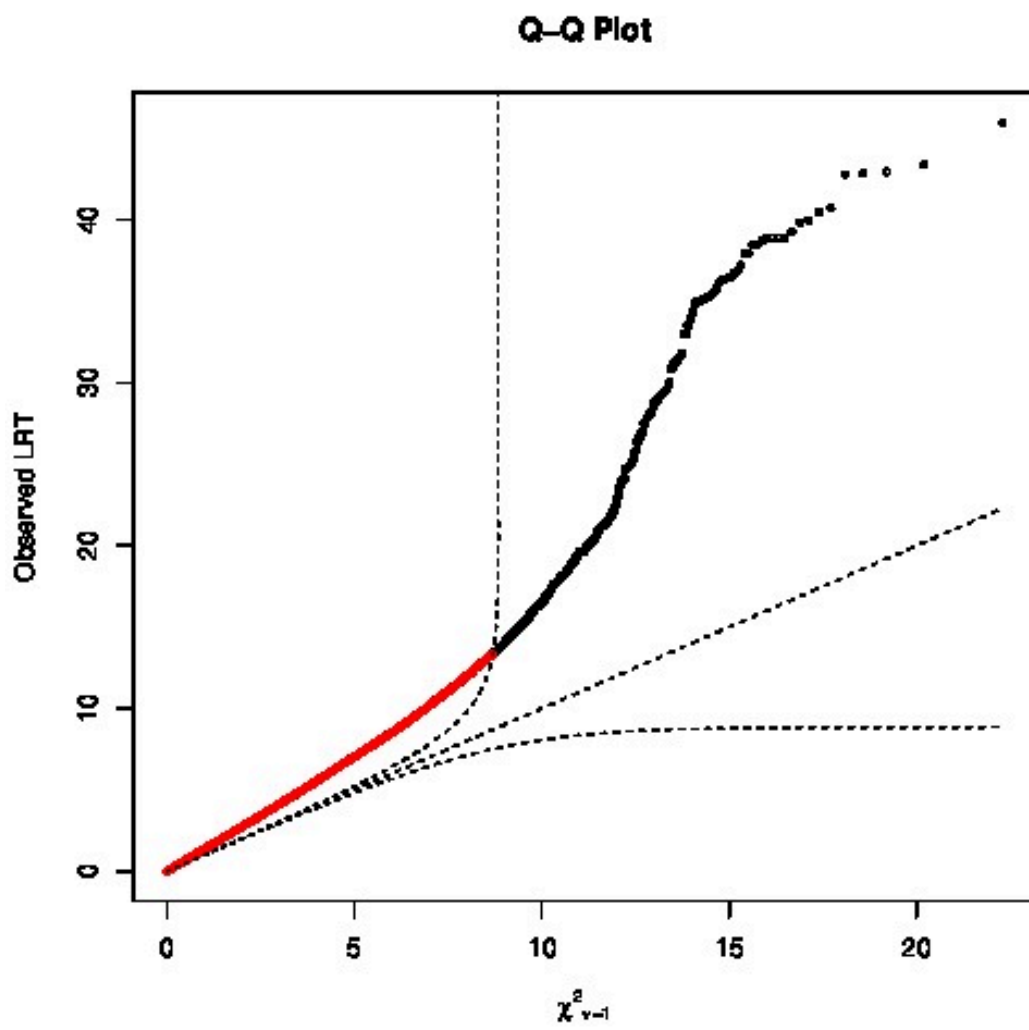

Figure S6 Quantile Quantile plot for FFT QTL

Supplement: 8f7ba7325102389dbb6f5bf44e853ee9_genetics.113.157628-8.pdf [file 8f7ba7325102389dbb6f5bf44e853ee9_genetics.113.157628-8.pdf]

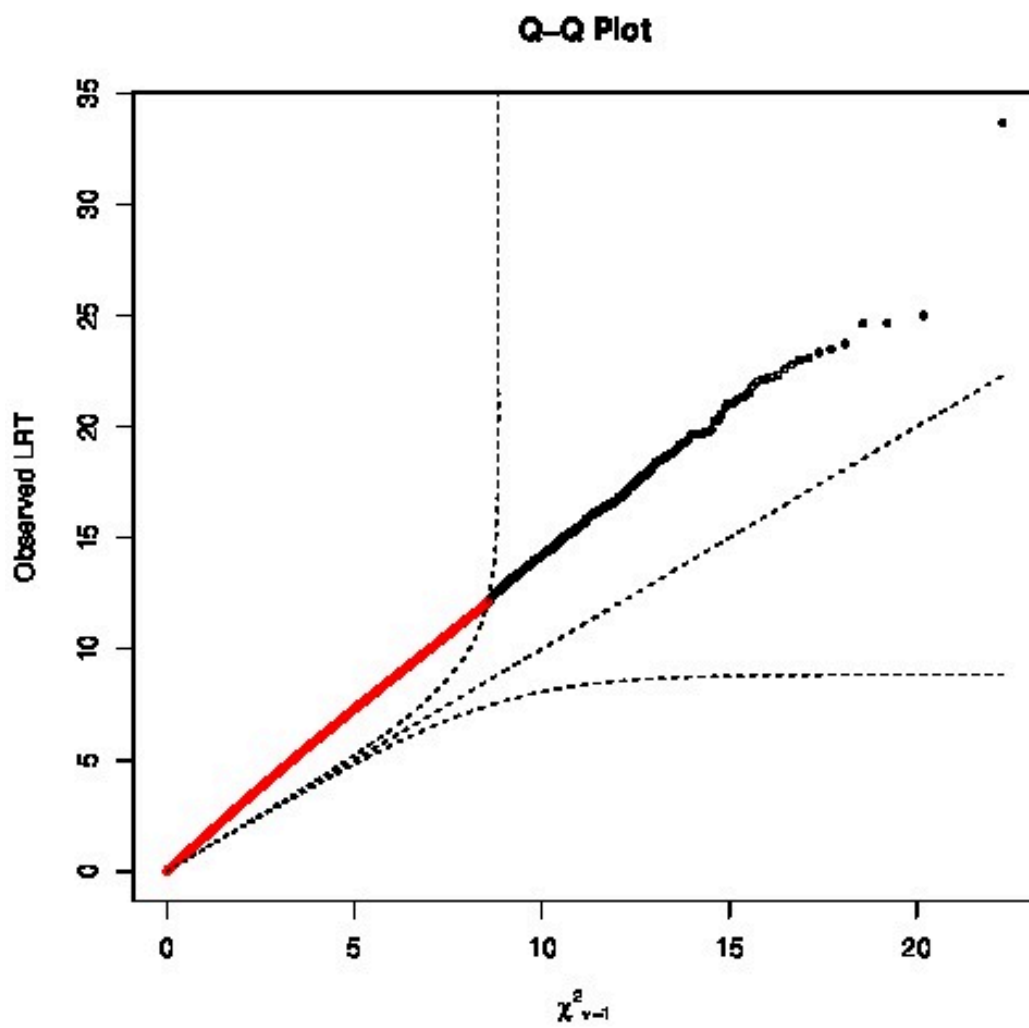

Figure S7 Quantile Quantile plot for THERM QTL

Supplement: d12b8bd0816d42473247a7e395a11b00_genetics.113.157628-5.pdf [file d12b8bd0816d42473247a7e395a11b00_genetics.113.157628-5.pdf]
